# Supplementary material for: Effect of chiral camphor thiolate ligands on the structure and stability of Au19 nanoclusters
Source: Royal Society of Chemistry journal article supplement (doi:10.1039/d5qi00167f), 2025-01-01
Supplement: d5qi00167f1.pdf [file d5qi00167f1.pdf]

Supplementary Information (SI) for Inorganic Chemistry Frontiers.

This journal is © The Royal Society of Chemistry 2024

## Supplementary Information

### Effect of chiral camphor thiolate ligands on the structure and stability of Au<sub>19</sub> nanoclusters

Xiaoya Zhang,<sup>a</sup> Shuwen Wu,<sup>a</sup> Qinzhen Li,<sup>a</sup> Jinsong Chai,<sup>a</sup> Guiqi Gao,<sup>\*a</sup> Baoyu Huang,<sup>\*b</sup>

Sha Yang<sup>\*a</sup> and Manzhou Zhu<sup>a</sup>

<sup>a</sup>Regulation of Hybrid Materials of Ministry of Education, Department of Chemistry and Anhui Province Key Laboratory of Chemistry for Inorganic/Organic Hybrid Functionalized Materials, Anhui University, Hefei, Anhui230601, China.

<sup>b</sup>Department Hunan Provincial Key Laboratory of Environmental Catalysis & Waste Recycling, College of Materials and Chemical Engineering, Hunan Institute of Engineering, 411104 Xiangtan, China.

\* Corresponding author. E-mail address: yangshac@ahu.edu.cn;  
gaoguiqi1@126.com; 22164@hnie.edu.cn

## **Au<sub>19</sub> Stability test**

### **Acidity and oxidation stability test**

CH<sub>3</sub>COOH and tert-Butyl hydroperoxide solution (tbhp) were selected as acids and oxidants respectively. The 1 mg S-Au<sub>19</sub> cluster was dissolved in 3 mL toluene, and the initial UV-vis and CD spectra were recorded.

Subsequently, 60  $\mu$ L 1 M acetic acid solution was added to the toluene solution of the clusters. The instability of S-Au<sub>19</sub> under acidic condition was determined by UV-vis and CD spectroscopy (Fig. S11a and S11b). At 10 min, the characteristic peaks of UV-vis and CD were reduced. The characteristic peaks of UV-vis and CD continued to weaken until 24 h. Although there was a weak trend, the clusters were destroyed in the acidic environment. In addition, tbhp (60  $\mu$ L) was used to replace acetic acid, and the stability test was carried out in the oxidizing environment. It was found that the characteristic peaks of UV-vis and CD almost disappeared at 6h, and the clusters completely broke down at 9 h, so the clusters are unstable in the oxidizing environment (Fig. S11c and S11d). R-Au<sub>19</sub> is also unstable in acidic and oxidizing environments (Fig. S12).

### **UV light stability test**

Under UV light condition, the UV-vis characteristic peaks of R/S-Au<sub>19</sub> began to weaken at 3 h, and became weaker and weaker with time. At 14 h, the UV-vis characteristic peaks disappeared. The clusters were completely destroyed, hence, R/S-Au<sub>19</sub> are unstable under UV light condition (Fig. S10b and 10d).

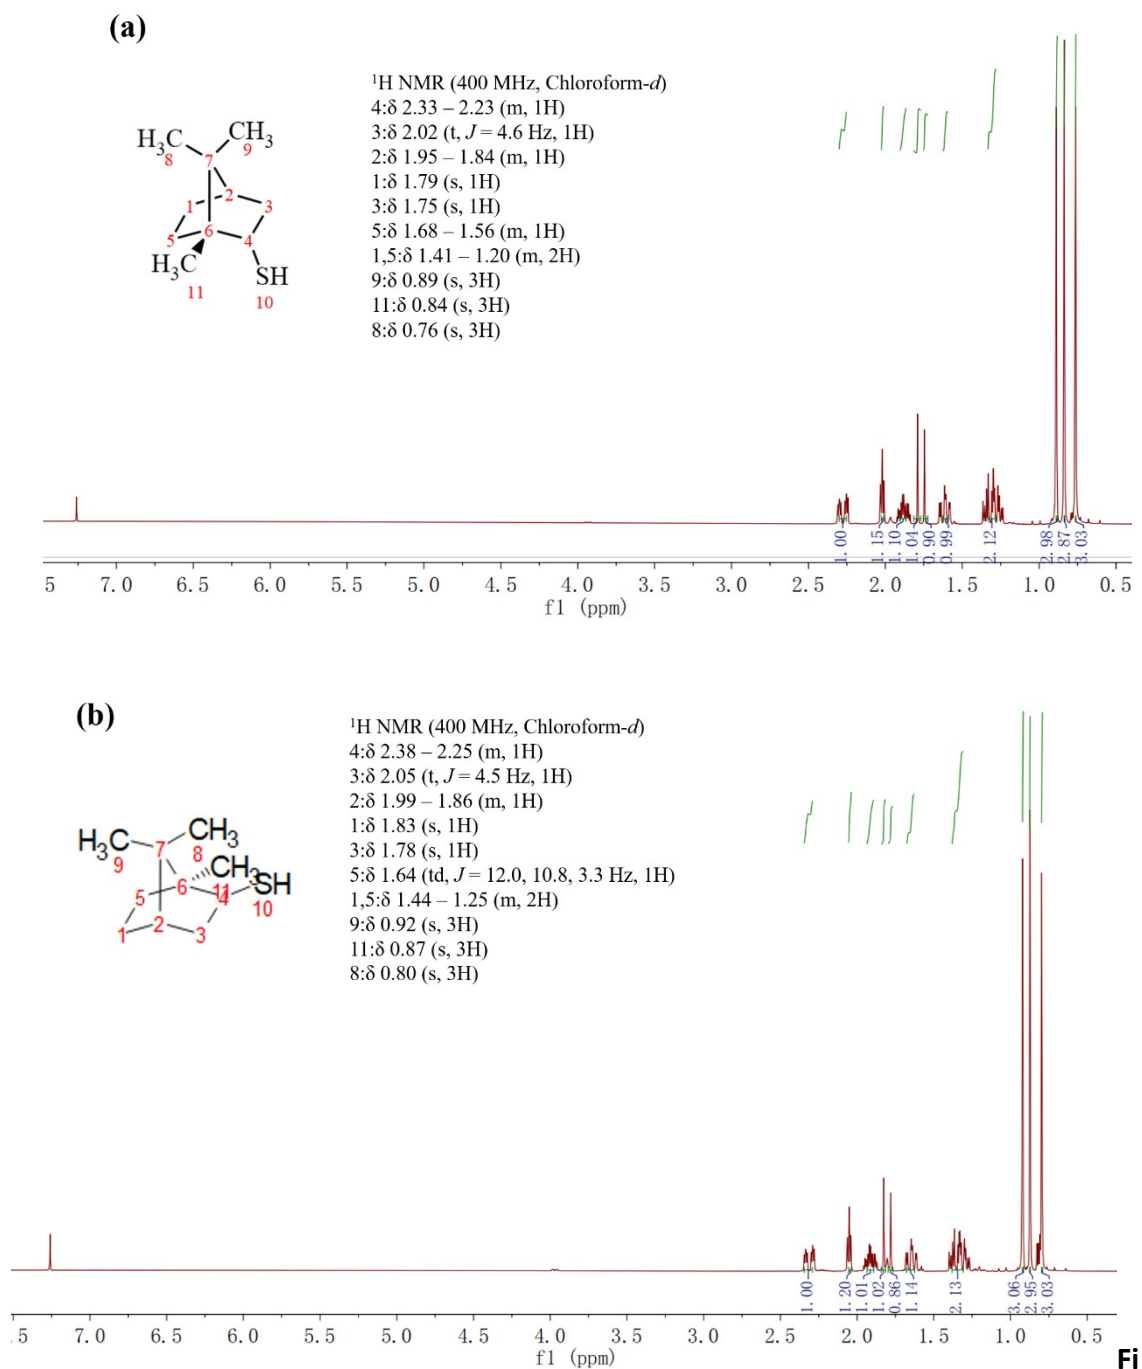

**g. S1** <sup>1</sup>H NMR spectra of (+)-camphor thiol (a) and (-)-camphor thiol (b) in CDCl<sub>3</sub>.

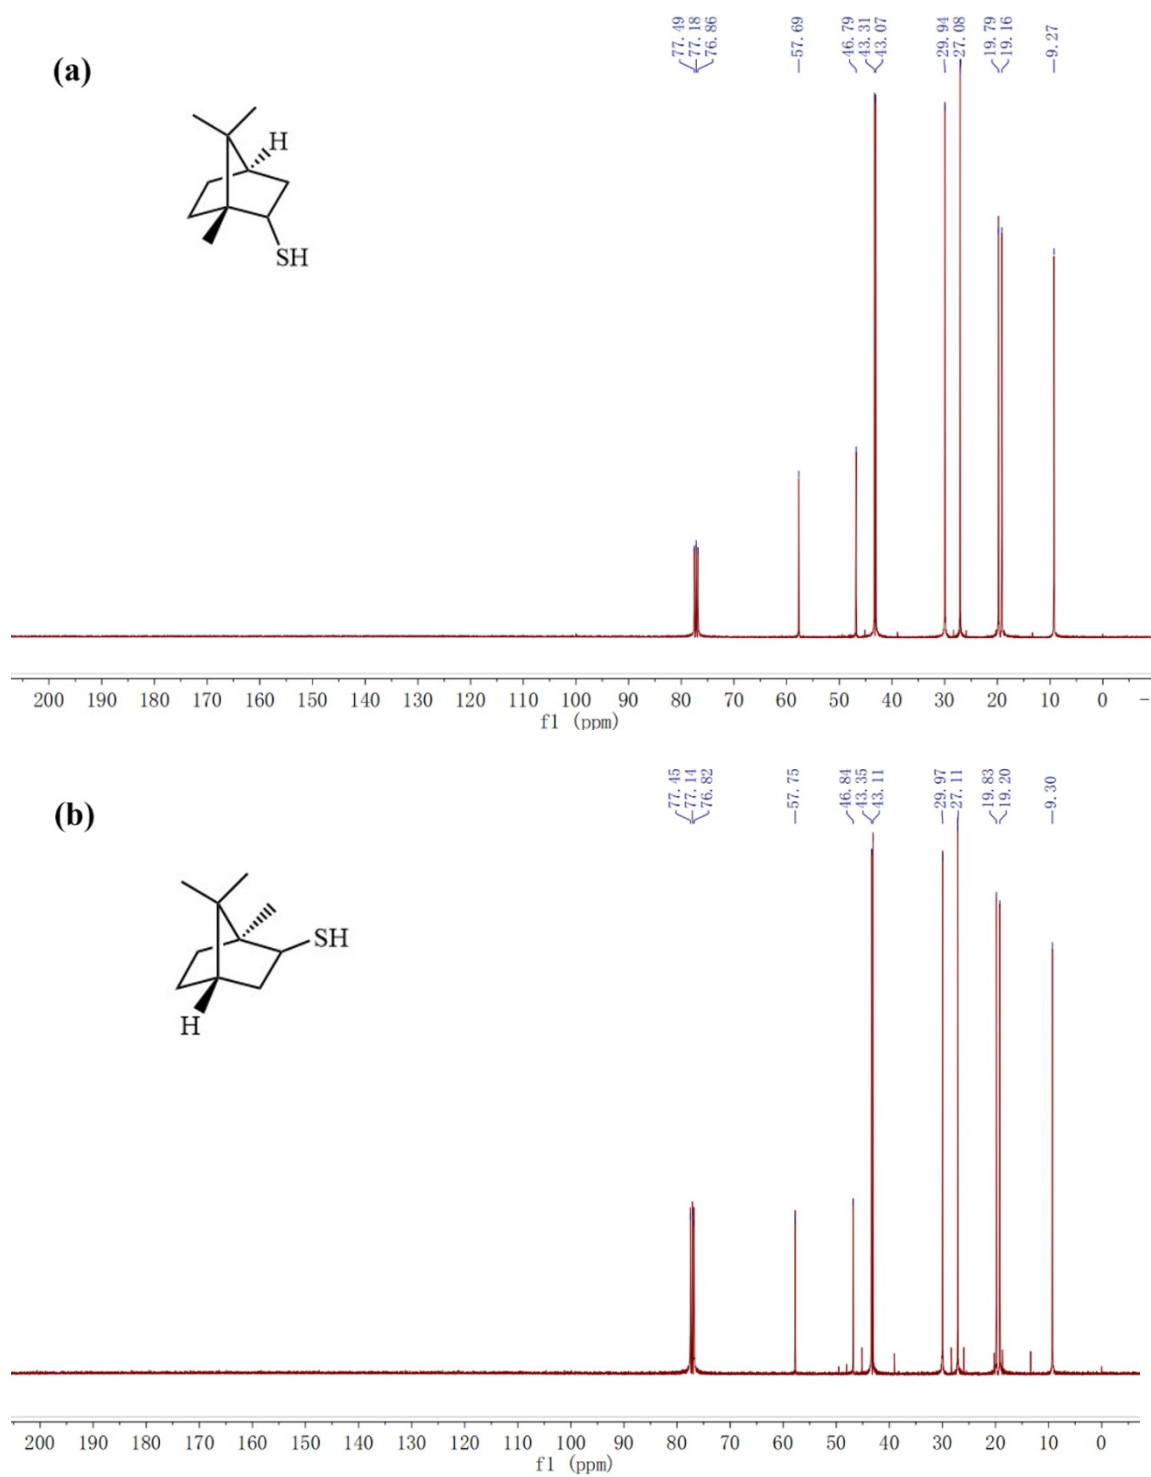

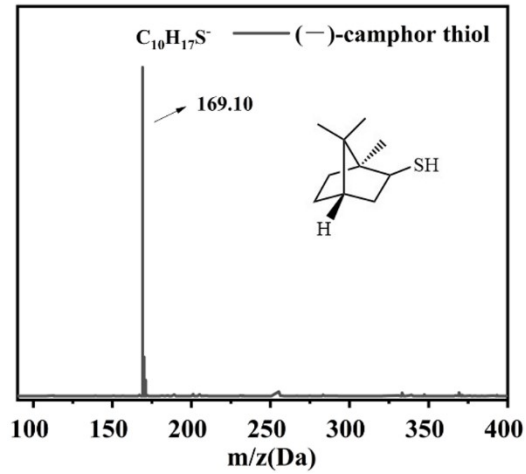

**Fig. S3** Electrospray ionization mass spectra of (-)-camphor thiol.

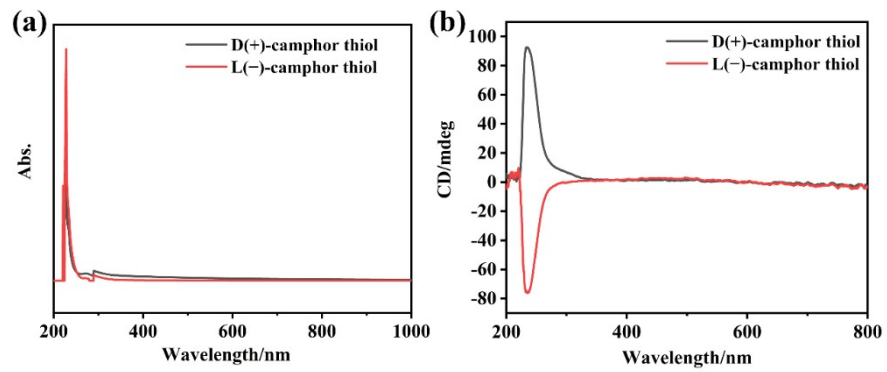

**Fig. S4** (a) UV-vis spectra and (b) CD spectra of (+/-)-camphor thiols.

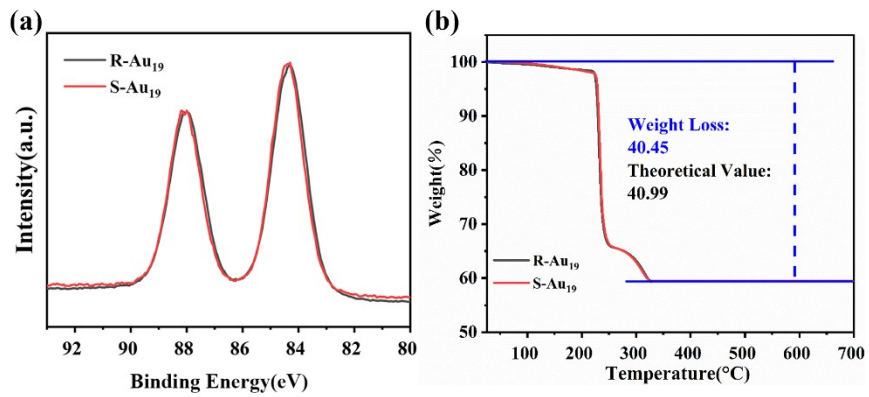

**Fig. S5** (a) Au 4f spectra of R/S-Au<sub>19</sub> and (b) TGA curve of R/S-Au<sub>19</sub>.

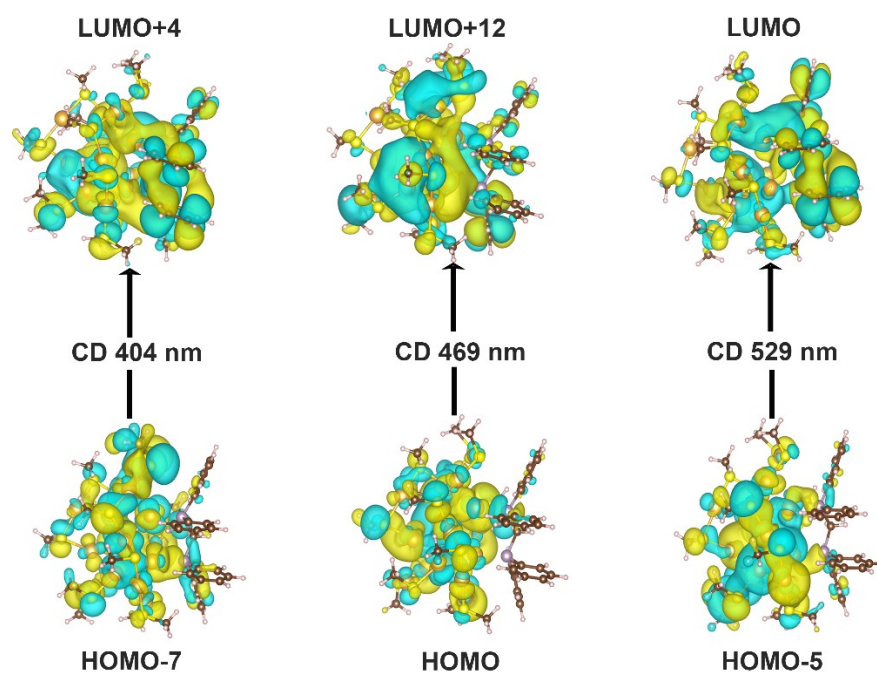

**Fig. S6** The calculated HOMO-7 to LUMO+4, HOMO to LUMO+12 and HOMO-5 to LUMO orbitals.

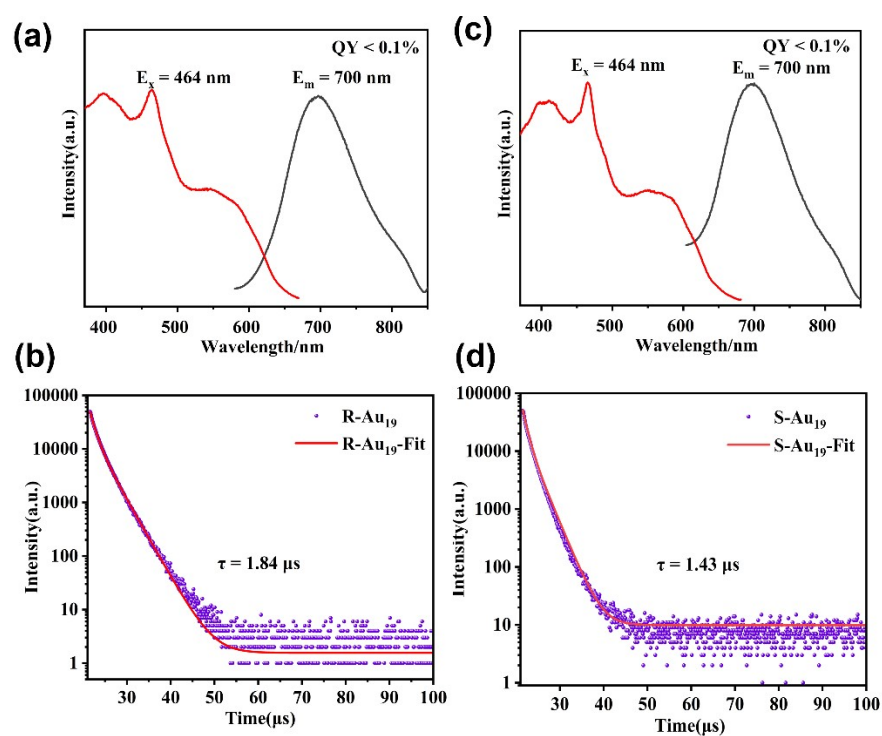

**Fig. S7** Photoluminescent excitation and emission spectra of R-Au<sub>19</sub> (a) and S-Au<sub>19</sub>(c). Fluorescence lifetime of R-Au<sub>19</sub> (b) and S-Au<sub>19</sub> (d).

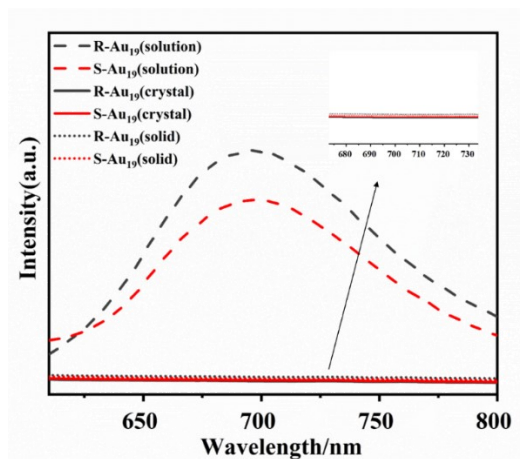

**Fig. S8** Comparison of photoluminescence intensity between R/S-Au<sub>19</sub> crystal, solid, and solution states.

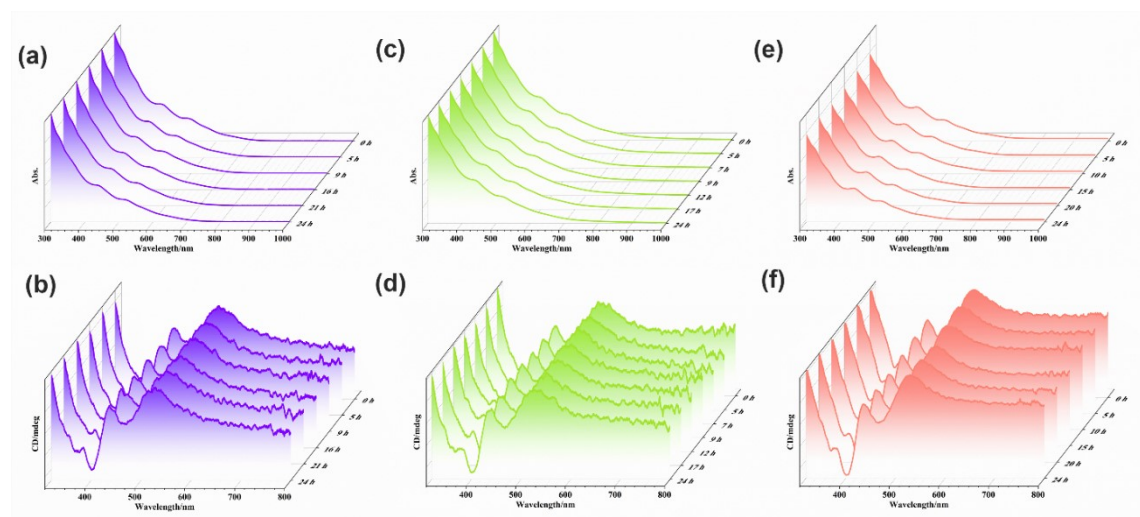

**Fig. S9** The time-dependent UV-vis spectra (a) and CD spectra (b) for alkalinity stability test of the S-Au<sub>19</sub>. The time-dependent UV-vis spectra (c) and CD spectra (d) for reducibility stability test of the S-Au<sub>19</sub>. The time-dependent UV-vis spectra (e) and CD spectra (f) for thermal stability test of the S-Au<sub>19</sub> at 60 °C.

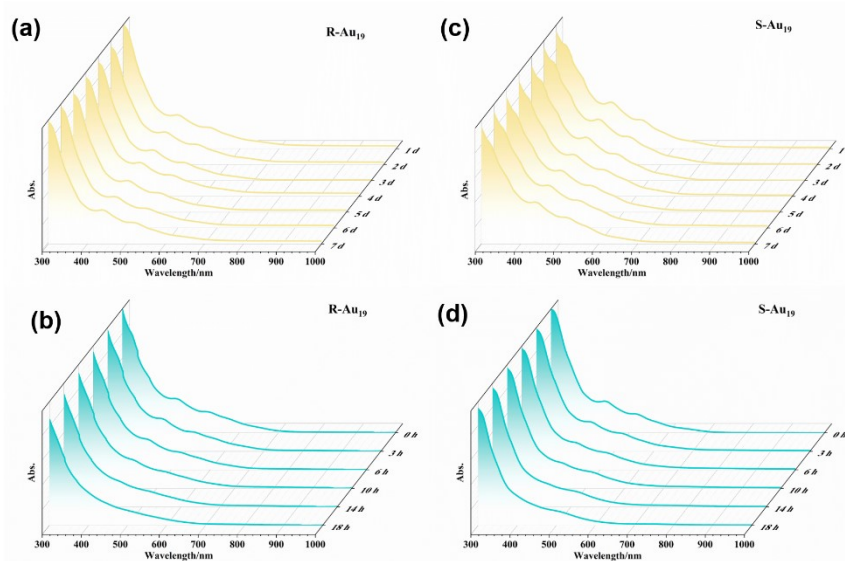

**Fig. S10** Time-dependent UV-vis spectra of R-Au<sub>19</sub> in daylight (a) and UV light (b) stability tests. Time-dependent UV-vis spectra of S-Au<sub>19</sub> in daylight (c) and UV light (d) stability tests.

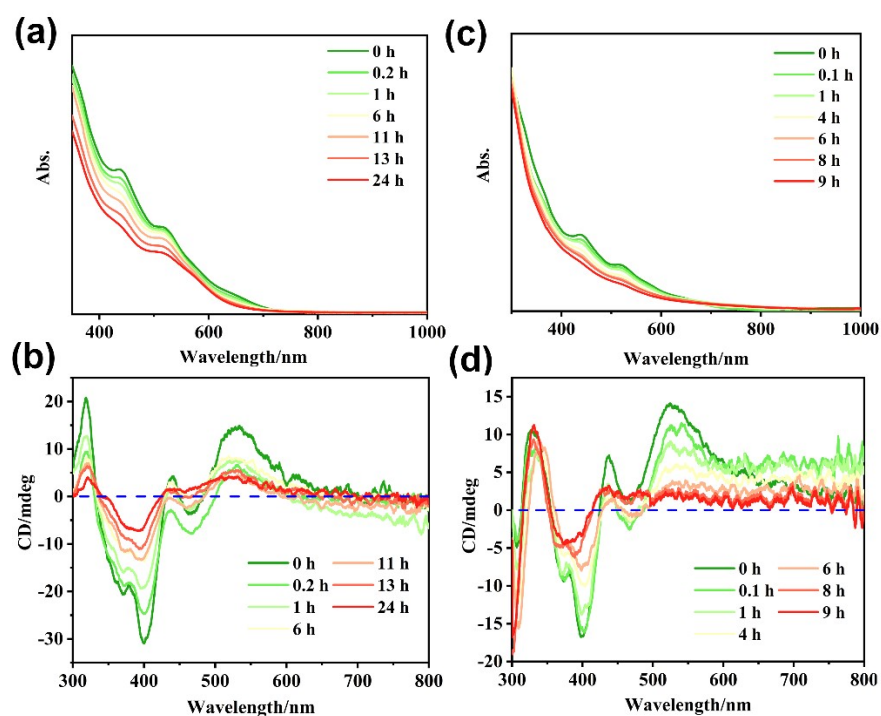

**Fig. S11** The time-dependent UV-vis spectra (a) and CD spectra (b) for acidity stability test of the S-Au<sub>19</sub>. The time-dependent UV-vis spectra (c) and CD spectra (d) for oxidation stability test of the S-Au<sub>19</sub>.



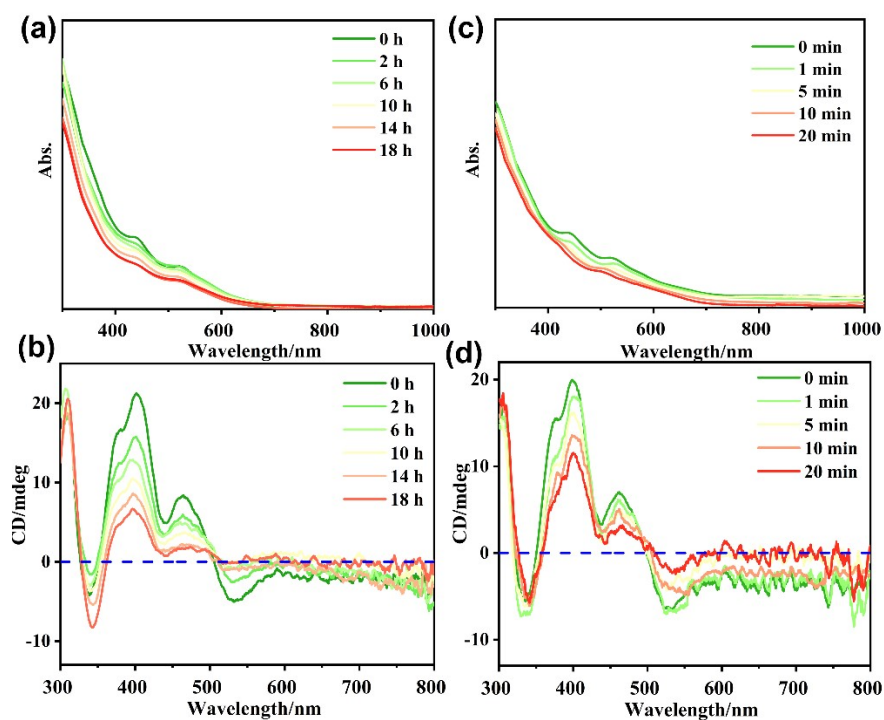

**Fig. S12** The time-dependent UV-vis spectra (a) and CD spectra (b) for acidity stability test of the R-Au<sub>19</sub>. The time-dependent UV-vis spectra (c) and CD spectra (d) for oxidation stability test of the R-Au<sub>19</sub>.

Table S1 Summarizes of the maximum anisotropy factors of partially reported chair nanoclusters.

| NCs                                                                                                                     | Maximum Anisotropy factors        | NCs                                                                                | Maximum Anisotropy factors |
|-------------------------------------------------------------------------------------------------------------------------|-----------------------------------|------------------------------------------------------------------------------------|----------------------------|
| Au <sub>19</sub> (SR) <sub>13</sub> DPPM                                                                                | 1.89×10 <sup>-3</sup> (this work) | [Au <sub>11</sub> (BINAP) <sub>4</sub> X <sub>2</sub> ] <sup>+</sup>               | 1.2×10 <sup>-3</sup> (12)  |
| [Au <sub>13</sub> Cu <sub>2</sub> (R/S-BDPP) <sub>3</sub> (SPy) <sub>6</sub> ] <sup>+</sup>                             | 1.2×10 <sup>-3</sup> (1)          | [Au <sub>24</sub> L <sub>6</sub> Cl <sub>4</sub> ] <sup>2+</sup>                   | 3×10 <sup>-3</sup> (13)    |
| [Ag <sub>28</sub> Cu <sub>12</sub> (SR) <sub>24</sub> ] <sup>4-</sup>                                                   | 1.0×10 <sup>-3</sup> (2)          | Ag <sub>29</sub> (R/S-DHLA) <sub>12</sub>                                          | 1.3×10 <sup>-3</sup> (14)  |
| [Au <sub>13</sub> L <sub>5</sub> Cl <sub>2</sub> ] <sub>3</sub>                                                         | 1.6×10 <sup>-3</sup> (3)          | [Au <sub>19</sub> (R/S-BINAP) <sub>4</sub> (PhC≡C)Cl <sub>4</sub> ]                | 1.2×10 <sup>-3</sup> (15)  |
| [Ag <sub>47</sub> L <sub>12</sub> (C≡C <sup>t</sup> Bu) <sub>16</sub> ] <sub>3</sub> BF <sub>4</sub>                    | 1.4×10 <sup>-3</sup> (4)          | [Au <sub>11</sub> (R/S-BINAP) <sub>4</sub> (PhC≡C) <sub>2</sub> ] <sub>2</sub> ·Cl | 1.2×10 <sup>-3</sup> (15)  |
| [Au <sub>7</sub> Ag <sub>6</sub> Cu <sub>2</sub> (BINAP) <sub>3</sub> (SCH <sub>2</sub> Ph) <sub>6</sub> ] <sup>+</sup> | 5×10 <sup>-4</sup> (5)            | Au <sub>24</sub> (L) <sub>2</sub> (SC <sub>6</sub> H <sub>11</sub> ) <sub>16</sub> | 0.75×10 <sup>-3</sup> (16) |
| Ag <sub>40</sub>                                                                                                        | 1.6×10 <sup>-3</sup> (6)          | Au <sub>25</sub> [(Capt) <sub>18</sub> ] <sup>-</sup>                              | 4×10 <sup>-4</sup> (17)    |
| Au <sub>24</sub> Cd <sub>2</sub> (SAdm) <sub>12</sub> (BDPP) <sub>2</sub> Cl <sub>2</sub>                               | 1.2×10 <sup>-4</sup> (7)          | Au <sub>38</sub> (SG) <sub>24</sub>                                                | 1.08×10 <sup>-3</sup> (18) |
| Au <sub>10</sub> (R/S-BINAP) <sub>4</sub>                                                                               | 6.6×10 <sup>-3</sup> (8)          | Au <sub>38</sub> (Capt) <sub>24</sub>                                              | 4×10 <sup>-3</sup> (18)    |
| Au <sub>9</sub> (R/S-BINAP) <sub>4</sub>                                                                                | 3.7×10 <sup>-3</sup> (8)          | Au <sub>38</sub> (2-PET) <sub>24-x</sub> (CamS) <sub>x</sub>                       | 7×10 <sup>-5</sup> (19)    |
| L/R-Au <sub>20</sub> ( α CD )                                                                                           | 3.5×10 <sup>-3</sup> (9)          | Au <sub>40</sub> (2-PET) <sub>24-x</sub> (CamS) <sub>x</sub>                       | 6×10 <sup>-5</sup> (19)    |
| Ag <sub>78</sub> (R/S-BDPP) <sub>6</sub> (SR) <sub>42</sub>                                                             | 2×10 <sup>-3</sup> (10)           | Au <sub>40</sub> (2-PET) <sub>24-x</sub> (S-BINAS) <sub>x</sub>                    | 7.5×10 <sup>-4</sup> (19)  |
| Au <sub>38</sub> (2-PET) <sub>24</sub>                                                                                  | 4×10 <sup>-3</sup> (11)           | Au <sub>40</sub> (2-PET) <sub>24</sub>                                             | 6×10 <sup>-3</sup> (20)    |

Table S2 Crystal data and structure refinement for R-Au<sub>19</sub> and S-Au<sub>19</sub>.

|                                             |                                                                                       |                                                                                       |
|---------------------------------------------|---------------------------------------------------------------------------------------|---------------------------------------------------------------------------------------|
| CCDC Number                                 | 2381009                                                                               | 2381011                                                                               |
| Identification code                         | R-Au <sub>19</sub>                                                                    | S-Au <sub>19</sub>                                                                    |
| Empirical formula                           | C <sub>155.5</sub> H <sub>244</sub> Au <sub>19</sub> ClP <sub>2</sub> S <sub>13</sub> | C <sub>155.5</sub> H <sub>244</sub> Au <sub>19</sub> ClP <sub>2</sub> S <sub>13</sub> |
| Formula weight                              | 6370.03                                                                               | 6370.03                                                                               |
| Temperature/K                               | 120                                                                                   | 120.15                                                                                |
| Crystal system                              | orthorhombic                                                                          | orthorhombic                                                                          |
| Space group                                 | P2 <sub>1</sub> 2 <sub>1</sub> 2 <sub>1</sub>                                         | P2 <sub>1</sub> 2 <sub>1</sub> 2 <sub>1</sub>                                         |
| a/Å                                         | 19.1670(3)                                                                            | 19.2020(3)                                                                            |
| b/Å                                         | 22.9143(6)                                                                            | 22.8560(4)                                                                            |
| c/Å                                         | 43.0420(7)                                                                            | 43.0315(7)                                                                            |
| α/°                                         | 90                                                                                    | 90                                                                                    |
| β/°                                         | 90                                                                                    | 90                                                                                    |
| γ/°                                         | 90                                                                                    | 90                                                                                    |
| Volume/Å <sup>3</sup>                       | 18904.0(7)                                                                            | 18885.7(5)                                                                            |
| Z                                           | 4                                                                                     | 4                                                                                     |
| ρ <sub>calc</sub> /g/cm <sup>3</sup>        | 2.238                                                                                 | 2.240                                                                                 |
| μ/mm <sup>-1</sup>                          | 28.858                                                                                | 28.886                                                                                |
| F(000)                                      | 11732.0                                                                               | 11732.0                                                                               |
| Crystal size/mm <sup>3</sup>                | 0.8 × 0.2 × 0.05                                                                      | 0.265 × 0.088 × 0.017                                                                 |
| Radiation                                   | Cu Kα (λ = 1.54184)                                                                   | Cu Kα (λ = 1.54184)                                                                   |
| 2θ range for data collection/°              | 4.106 to 135.982                                                                      | 4.378 to 156.816                                                                      |
| Index ranges                                | -9 ≤ h ≤ 23,<br>-26 ≤ k ≤ 27,<br>-44 ≤ l ≤ 51                                         | -24 ≤ h ≤ 23,<br>-27 ≤ k ≤ 29,<br>-45 ≤ l ≤ 54                                        |
| Reflections collected                       | 63965                                                                                 | 120403                                                                                |
| Independent reflections                     | 31355 [R <sub>int</sub> = 0.1334,<br>R <sub>sigma</sub> = 0.1339]                     | 38612 [R <sub>int</sub> = 0.1054,<br>R <sub>sigma</sub> = 0.0803]                     |
| Data/restraints/parameters                  | 31355/2644/1687                                                                       | 38612/2105/1736                                                                       |
| Goodness-of-fit on F <sup>2</sup>           | 1.140                                                                                 | 1.091                                                                                 |
| Final R indexes [I ≥ 2σ (I)]                | R <sub>1</sub> = 0.1239,<br>wR <sub>2</sub> = 0.3041                                  | R <sub>1</sub> = 0.0688,<br>wR <sub>2</sub> = 0.1844                                  |
| Final R indexes [all data]                  | R <sub>1</sub> = 0.1479,<br>wR <sub>2</sub> = 0.3288                                  | R <sub>1</sub> = 0.0961,<br>wR <sub>2</sub> = 0.2012                                  |
| Largest diff. peak/hole / e Å <sup>-3</sup> | 5.26/-3.40                                                                            | 3.16/-2.35                                                                            |
| Flack parameter                             | 0.03(3)                                                                               | 0.11(2)                                                                               |

## References

- (1) G. Deng, S. Malola, J. Yan, Y. Han, P. Yuan, C. Zhao, X. Yuan, S. Lin, Z. Tang, B. K. Teo, H. Häkkinen and N. Zheng, From Symmetry Breaking to Unraveling the Origin of the Chirality of Ligated Au<sub>13</sub>Cu<sub>2</sub> Nanoclusters, *Angew. Chem. Int. Ed.*, 2018, **57**, 3421-3425.
- (2) J. Yan, H. Su, H. Yang, C. Hu, S. Malola, S. Lin, B. K. Teo, H. Häkkinen and N. Zheng, Asymmetric synthesis of chiral bimetallic [Ag<sub>28</sub>Cu<sub>12</sub>(SR)<sub>24</sub>]<sup>4-</sup> nanoclusters via ion pairing, *J. Am. Chem. Soc.*, 2016, **138**, 12751-12754.
- (3) Y. Yang, Q. Zhang, Z. Guan, Z. Nan, J. Wang, T. Jia and W. Zhan, Enantioselective synthesis of homochiral Au<sub>13</sub> nanoclusters and their chiroptical activities, *Inorg. Chem.*, 2019, **58**, 3670-3675.
- (4) W.-D. Liu, J.-Q. Wang, S.-F. Yuan, X. Chen and Q.-M. Wang, Chiral superatomic nanoclusters Ag<sub>47</sub> induced by the ligation of amino acids, *Angew. Chem. Int. Ed.*, 2021, **60**, 11430-11435.
- (5) H. Shen, Z. Xu, L. Wang, Y.-Z. Han, X. Liu, S. Malola, B. K. Teo, H. Häkkinen and N. Zheng, Tertiary chiral nanostructures from C-H...F directed assembly of chiroptical superatoms, *Angew. Chem. Int. Ed.*, 2021, **60**, 22411-22416.
- (6) W. Du, X. Kang, S. Jin, D. Liu, S. Wang and M. Zhu, Different types of ligand exchange induced by Au substitution in a maintained nanocluster template, *Inorg. Chem.*, 2020, **59**, 1675-1681.
- (7) J. Zhou, T. Li, Q. Li, P. Zheng, S. Yang, J. Chai and M. Zhu, Insight into the effects of chiral diphosphine ligands on the structure and optical properties of the Au<sub>24</sub>Cd<sub>2</sub> nanocluster, *Inorg. Chem.*, 2022, **61**, 6493-6499.
- (8) J.-Q. Wang, Z.-J. Guan, W.-D. Liu, Y. Yang and Q.-M. Wang, Chiroptical Activity Enhancement via Structural Control: The Chiral Synthesis and Reversible Interconversion of Two Intrinsically Chiral Gold Nanoclusters, *J. Am. Chem. Soc.*, 2019, **141**, 2384-2390.
- (9) Y. Zhu, H. Wang, K. Wan, J. Guo, C. He, Y. Yu, L. Zhao, Y. Zhang, J. Lv, L. Shi, R. Jin, X. Zhang, X. Shi and Z. Tang, Enantioseparation of Au<sub>20</sub>(PP<sub>3</sub>)<sub>4</sub>Cl<sub>4</sub> Clusters with Intrinsically Chiral Cores, *Angew. Chem. Int. Ed.*, 2018, **57**, 9059.
- (10) H. Yang, J. Yan, Y. Wang, G. Deng, H. Su, X. Zhao, C. Xu, B. K. Teo and N. Zheng, From Racemic Metal Nanoparticles to Optically Pure Enantiomers in One Pot, *J. Am. Chem. Soc.*, 2017, **139**, 16113-16116.
- (11) I. Dolamic, S. Knoppe, A. Dass and T. Bürgi, First enantioseparation and circular dichroism spectra of Au<sub>38</sub> clusters protected by achiral ligands, *Nat. Commun.*, 2012, **3**, 798.
- (12) Y. Yanagimoto, Y. Negishi, H. Fujihara and T. Tsukuda, Chiroptical Activity of BINAP-Stabilized Undecagold Clusters, *J. Phys. Chem. B*, 2006, **110**, 11611-11614.
- (13) M. Sugiuchi, Y. Shichibu and K. Konishi, An Inherently Chiral Au<sub>24</sub> Framework with Double-Helical Hexagold Strands, *Angew. Chem. Int. Ed.*, 2018, **57**, 7855.
- (14) T. Nakashima, R. Tanibe, H. Yoshida, M. Ehara, M. Kuzuhara and T. Kawai, Self-Regulated Pathway-Dependent Chirality Control of Silver Nanoclusters, *Angew.*

- Chem. Int. Ed.*, 2022, **61**, e202208273.
- (15) W.-D. Si, Y.-Z. Li, S.-S. Zhang, S. Wang, L. Feng, Z.-Y. Gao, C.-H. Tung and D. Sun, Toward Controlled Syntheses of Diphosphine-Protected Homochiral Gold Nanoclusters through Precursor Engineering, *ACS Nano*, 2021, **15**, 16019-16029.
- (16) C. Liu, Y. Zhao, T.-S. Zhang, C.-B. Tao, W. Fei, S. Zhang and M.-B. Li, Asymmetric transformation of achiral gold nanoclusters with negative nonlinear dependence between chiroptical activity and enantiomeric excess, *Nat. Commun.*, 2023, **14**, 3730.
- (17) J. Olesiak-Banska, M. Waszkielewicz, P. Obstarczyk and M. Samoc, Two-photon chiro-optical properties of gold Au<sub>25</sub> nanoclusters, *Chem. Soc. Rev.*, 2019, **48**, 4087.
- (18) Q. Xu , S. Kumar , S. Jin , H. Qian , M. Zhu and R. Jin, Chiral 38-Gold-Atom Nanoclusters: Synthesis and Chiroptical Properties, *Small*, 2014, **10**, 1008-1014.
- (19) S. Knoppe, A. Dassb and T. Bürgi, Strong non-linear effects in the chiroptical properties of the ligand-exchanged Au<sub>38</sub> and Au<sub>40</sub> clusters, *Nanoscale*, 2012, **4**, 4211-4216.
- (20) S. Knoppe, I. Dolamic, A. Dass, and T. Bürgi, Separation of Enantiomers and CD Spectra of Au<sub>40</sub>(SCH<sub>2</sub>CH<sub>2</sub>Ph)<sub>24</sub>: Spectroscopic Evidence for Intrinsic Chirality, *Angew. Chem. Int. Ed.*, 2012, **51**, 7589-7591.
